# Supplementary material for: An amorphous Cu–In–S nanoparticle-based precursor ink with improved atom economy for CuInSe2 solar cells with 10.85% efficiency
Source: Royal Society of Chemistry journal article supplement (doi:10.1039/c6gc03280j), 2017-01-01
Supplement: c6gc03280j1.pdf [file c6gc03280j1.pdf]

## Supporting Information

### Amorphous Cu-In-S nanoparticle-based precursor ink with improved atom economy for CuInSe<sub>2</sub> solar cells with 10.85% efficiency

SeJin Ahn,<sup>a,b</sup> Shanza Rehan,<sup>a,b</sup> Dong Gwon Moon,<sup>a,c</sup> Young-Joo Eo,<sup>a,b</sup> SeungKyu Ahn,<sup>a,b</sup> Jae Ho Yun,<sup>a,b</sup> Ara Cho,<sup>\*,a,b</sup> and Jihye Gwak,<sup>\*,a,b</sup>

<sup>a</sup>Photovoltaic Laboratory, Korea Institute of Energy Research, Daejeon 305-343, Korea.

<sup>b</sup>Department of Renewable Energy Engineering, Korea University of Science and Technology (UST), DaeJeon 305-350, Korea.

<sup>c</sup>Department of Materials Science and Engineering, Yonsei University, Seoul 120-749, Korea.

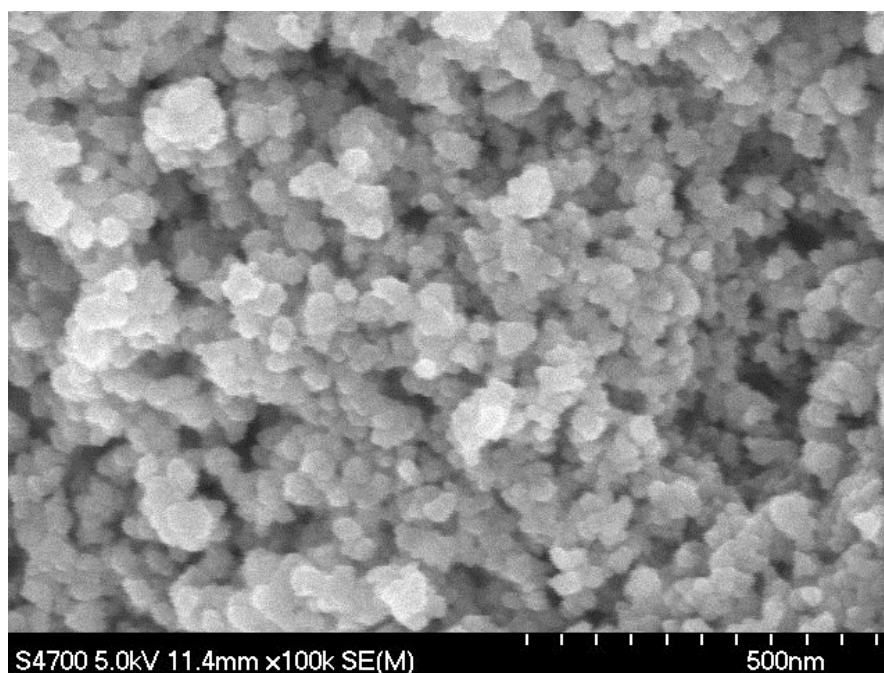

Figure S1. SEM image of the amorphous Cu-In-S nanoparticles.

Table S2. Calculation procedures for quantitative estimation of the atom economy of the two routes using a value of OMR.

$$\text{Organic to Metal Ratio (OMR)} = \frac{\text{amount of organic ligand (MEA) in mol}}{\text{amount of metal atoms in mol}}$$

|                                                        | Route 1        | Route 2                                               |
|--------------------------------------------------------|----------------|-------------------------------------------------------|
| <b>MEA / mol</b> ----- (i)                             | <b>0.01965</b> | <b>0.0109</b>                                         |
| Cu-In-S nanoparticles (NP)* / mol                      | 0.00495        | 0.00495                                               |
| <b>Metal atoms (Cu and In) in NPs / mol</b> ----- (ii) | <b>0.0099</b>  | <b>0.0099</b>                                         |
| Metal-acetate / mol                                    | 0              | Cu(II)-acetate : 0.00083<br>In(III)-acetate : 0.00083 |
| <b>Metal atoms in metal-acetate / mol</b> ----- (iii)  | <b>0</b>       | <b>0.00166</b>                                        |
| <b>Total metal atoms / mol</b> ----- (iv)=(ii)+(iii)   | <b>0.0099</b>  | <b>0.01156</b>                                        |
| <b>OMR</b> ----- (i)/(iv)                              | <b>1.985</b>   | <b>0.943</b>                                          |
| <b>Relative OMR</b>                                    | <b>1</b>       | <b>0.475</b>                                          |

\* MW of CuInS<sub>2</sub> (242.5) was used for calculation of mol of Cu-In-S nanoparticles.

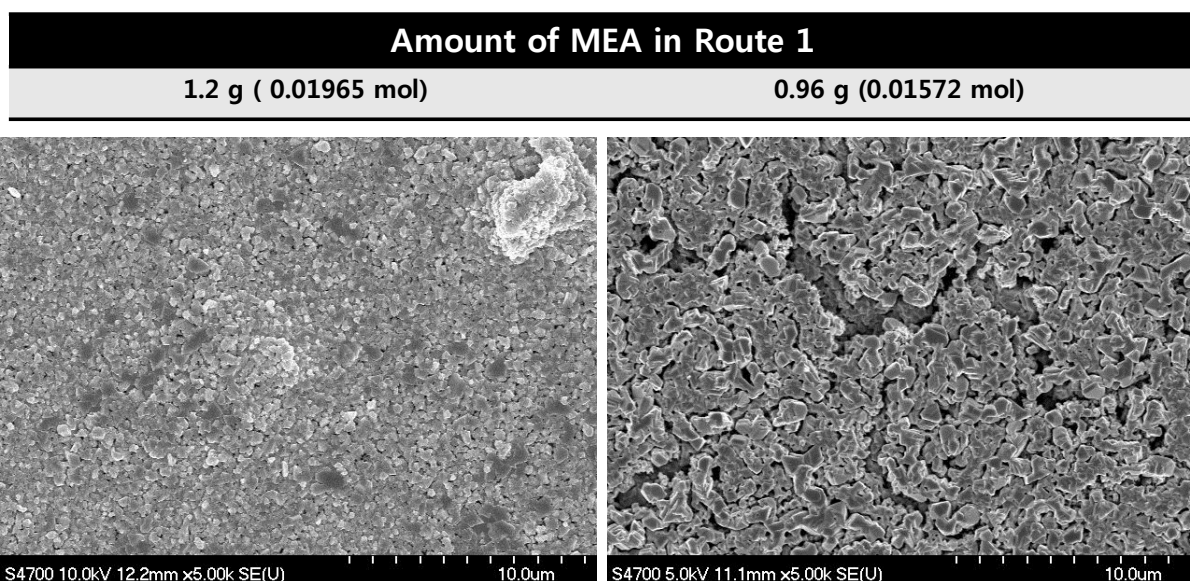

Figure S3. SEM images of the CISe films processed using the Route 1 ink with different amounts of MEA.
